# Supplementary material for: Thermodynamic assessment of the oxygen reduction activity in aqueous solutions
Source: Royal Society of Chemistry journal article supplement (doi:10.1039/c7cp05448c), 2017-01-01
Supplement: c7cp05448c1.pdf [file c7cp05448c1.pdf]

## **Electronic Supplementary Information**

### **Are scaling relations truly universal?**

Vladimir Tripkovic<sup>1</sup>

<sup>1</sup> Department of Energy Conversion and Storage, Technical University of Denmark, DK-2800 Kgs. Lyngby, Denmark.

### Note 1: Differential adsorption energies for the OH and OOH intermediates

Only for Pt(111) and Ir(111), the lowest differential OH adsorption energy is at the 1/3 ML OH coverage, i.e. in a half dissociated water layer.<sup>30,32,33</sup> On all the other metals and alloys the OH is most stable in water bilayer at the 1/9 ML OH coverage. As for OOH, the highest binding energy is obtained at 1/6 ML coverage irrespective of the catalyst surface. For the strained Pt(111), Pd(111) and Ag(111) we assume the same OH/OOH coverages as those on pristine surfaces.

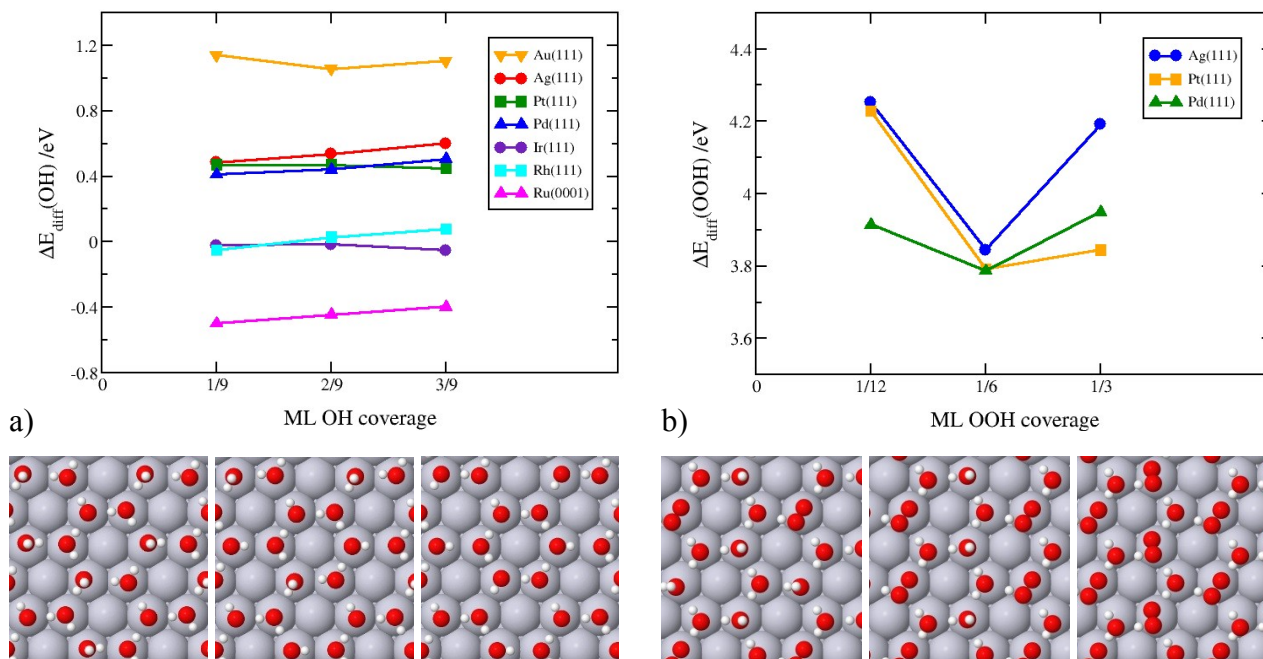

Figure S1 Differential adsorption energies of a) OH and b) OOH on the (111) surfaces of late transition metals. Snapshots show structures at different OH/OOH coverages in the water bilayer.

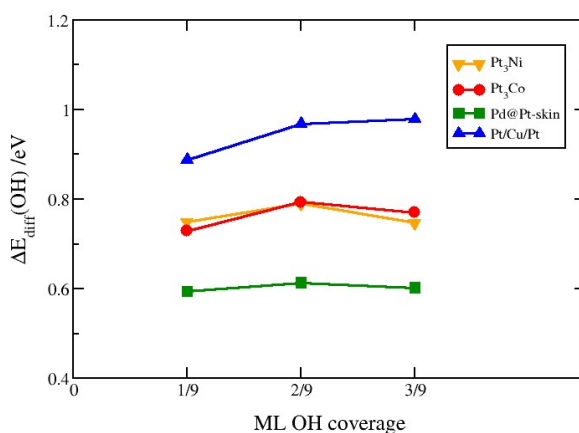

Figure S2 Differential adsorption energies of OH on the (111) surfaces of selected Pt-alloys. For the OOH the 1/6 ML coverage found on metals was assumed.

**Note 2: Calculated values of lattice constants and binding energies of different intermediates**

Table S1 The RPBE optimized lattice constants.

| Element | Lattice Constant | Element/alloy      | Lattice Constant |
|---------|------------------|--------------------|------------------|
| Pt      | 3.991            | Rh                 | 3.865            |
| Pd      | 3.980            | Ru                 | 3.850            |
| Ag      | 4.172            | Pt <sub>3</sub> Ni | 3.907            |
| Au      | 4.186            | Pt <sub>3</sub> Co | 3.911            |
| Ir      | 3.883            |                    |                  |

Table S2 Binding energies of O, 'dry' and 'hydrated' OH and OOH intermediates.

| Surface                 | OH    | OH-wl | O     | OOH   | OOH-wl |
|-------------------------|-------|-------|-------|-------|--------|
| Pt(111)                 | 0.961 | 0.427 | 1.457 | 3.948 | 3.792  |
| +1%                     | 0.931 | 0.401 | 1.393 | 3.937 | 3.786  |
| +2%                     | 0.871 | 0.201 | 1.308 | 3.891 | 3.718  |
| Pt/Cu/Pt(111)           | 1.320 | 0.888 | 1.717 | 4.255 | 4.111  |
| Pd@Pt-skin(111)         | 1.045 | 0.581 | 1.513 | 4.009 | 3.862  |
| Pt <sub>3</sub> Ni(111) | 1.080 | 0.660 | 1.719 | 4.075 | 3.987  |
| Pt <sub>3</sub> Co(111) | 1.128 | 0.725 | 1.811 | 4.128 | 4.010  |
| Pd(111)                 | 0.904 | 0.412 | 1.444 | 4.009 | 3.787  |
| +1%                     | 0.853 | 0.308 | 1.385 | 4.008 | 3.741  |
| +2%                     | 0.812 | 0.319 | 1.338 | 3.960 | 3.725  |
| -1%                     | 0.936 | 0.462 | 1.499 | 4.040 | 3.816  |
| -2%                     | 0.971 | 0.481 | 1.559 | 4.060 | 3.826  |
| -3%                     | 1.005 | 0.492 | 1.631 | 4.088 | 3.893  |
| -4%                     | 1.052 | 0.570 | 1.705 | 4.118 | 3.927  |
| -5%                     | 1.064 | 0.700 | 1.756 | 4.128 | 3.987  |
| Pt@Pd-skin(111)         | 0.740 | 0.148 | 1.360 | 3.945 | 3.668  |
| Ag(111)                 | 0.831 | 0.487 | 2.056 | 4.123 | 3.846  |
| -1%                     | 0.849 | 0.510 | 2.069 | 4.111 | 3.804  |
| -2%                     | 0.903 | 0.515 | 2.116 | 4.135 | 3.820  |
| +1%                     | 0.799 | 0.468 | 2.032 | 4.107 | 3.830  |

|          |       |        |        |       |       |
|----------|-------|--------|--------|-------|-------|
| +2%      | 0.751 | 0.421  | 1.983  | 4.070 | 3.822 |
| +3%      | 0.696 | 0.403  | 1.926  | 4.032 | 3.817 |
| +4%      | 0.651 | 0.391  | 1.886  | 4.000 | 3.847 |
| +5%      | 0.607 | 0.387  | 1.839  | 3.965 | 3.809 |
| Au(111)  | 1.482 | 1.057  | 2.610  | 4.677 | 4.35  |
| Ir(111)  | 0.291 | -0.121 | 0.805  | 3.664 | -     |
| Rh(111)  | 0.463 | -0.049 | 0.697  | 3.716 | 3.575 |
| Ru(0001) | 0.027 | -0.497 | -0.150 | -     | -     |
